# Supplementary material for: Target Product Profile for a Diagnostic Assay to Differentiate between Bacterial and Non-Bacterial Infections and Reduce Antimicrobial Overuse in Resource-Limited Settings: An Expert Consensus
Source: PubMed Central journal article supplement (PMC4999186; doi:10.1371/journal.pone.0161721), 2016-08-25
Supplement: pone.0161721.s002.pdf [file pone.0161721.s002.pdf]

**Supplementary table 2: Details of the literature search terms (where applicable) and the chosen reference. Reasoning for deciding on certain characteristics are given in the text. “Not applicable” indicates that context specific parameters were needed that were proposed by SD and discussed and agreed by all authors.**

| Characteristic                | Search terms                                                                                                                                      | Chosen reference                                                         |
|-------------------------------|---------------------------------------------------------------------------------------------------------------------------------------------------|--------------------------------------------------------------------------|
| Target population             | fever AND/OR population AND/OR incidence AND/OR epidemiology AND/OR cases                                                                         | Gething <i>et. al.</i> 2010; WHO 2014 (IMCI); Feikin <i>et. al.</i> 2011 |
| Target level of health system | Not applicable.                                                                                                                                   | Maputo Declaration 2008                                                  |
| Target user                   | Clinical laboratory AND/OR Africa AND/OR low and middle income countries AND/OR microbiology AND/OR resource limited AND/OR diagnostic laboratory | Petti <i>et. al.</i> 2006                                                |
| Price of one test             | Not applicable.                                                                                                                                   | Expert consensus                                                         |
| Diagnostic sensitivity        | Sensitivity, specificity AND/OR diagnostic AND/OR impact                                                                                          | Lim <i>et. al.</i> 2006                                                  |
| Diagnostic specificity        |                                                                                                                                                   | Expert consensus                                                         |
| Multiplexing                  | Not applicable.                                                                                                                                   | Expert consensus                                                         |
| Ease of test performance      | Not applicable.                                                                                                                                   | Expert consensus                                                         |
| Sample type                   | Not applicable.                                                                                                                                   | Expert consensus                                                         |
| Volume                        | Not applicable.                                                                                                                                   | Expert consensus                                                         |
| Sample collection             | Not applicable.                                                                                                                                   | Industry standards                                                       |
| Additional sample preparation | Not applicable.                                                                                                                                   | Expert consensus                                                         |
| Kit configuration             | Not applicable.                                                                                                                                   | Industry standards                                                       |
| Batch/Quality control         | Not applicable.                                                                                                                                   | Expert consensus                                                         |
| Process control               | Not applicable.                                                                                                                                   | Expert consensus                                                         |
| Reagent preparation           | Target product profile AND/OR reagents AND/OR steps                                                                                               | Chua <i>et. al.</i> 2015                                                 |
| Time to result (per sample)   | Not applicable                                                                                                                                    | Expert consensus                                                         |
| Hands on time                 | Not applicable.                                                                                                                                   | Expert consensus                                                         |
| Sample throughput             | Not applicable.                                                                                                                                   | Expert consensus                                                         |
| Result stability              | Not applicable.                                                                                                                                   | Industry standard                                                        |
| Assay type                    | Not applicable.                                                                                                                                   | Expert consensus                                                         |
| Biosafety and waste disposal  | Not applicable.                                                                                                                                   | Laboratory Biosafety Manual, WHO 2014                                    |
| Storage conditions            | Target product profile AND/OR storage AND/OR tropical temperatures AND/OR hot AND/OR low and middle income countries                              | Chua <i>et. al.</i> 2015                                                 |
| Operation conditions          | Target product profile AND/OR operation AND/OR tropical temperatures AND/OR hot AND/OR low and middle income countries                            | Chua <i>et. al.</i> 2015                                                 |
| Shipping conditions           | Target product profile AND/OR operation AND/OR tropical temperatures AND/OR hot AND/OR low and middle income countries                            | Expert consensus                                                         |

|                             |                                                                                                                            |                                     |
|-----------------------------|----------------------------------------------------------------------------------------------------------------------------|-------------------------------------|
| Training requirements       | Target product profile AND/OR training<br>AND/OR point of care AND/OR diagnostic<br>AND/OR low and middle income countries | Chua <i>et. al.</i> 2015            |
| Equipment                   | Not applicable.                                                                                                            | Expert consensus                    |
| Power supply                | Target product profile AND/OR power<br>AND/OR point of care AND/OR diagnostic<br>AND/OR low and middle income countries    | Chua <i>et. al.</i> 2015            |
| Water supply                | Not applicable                                                                                                             | Industry standards                  |
| External maintenance        | Not applicable                                                                                                             | Industry standards                  |
| Calibration                 | Not applicable                                                                                                             | Industry standards                  |
| Data interpretation/ output | Not applicable                                                                                                             | Expert consensus                    |
| Connectivity                | FIND internal documentation                                                                                                | Isaak <i>et. al.</i> in preperation |
