# Supplementary material for: Target Product Profile for a Diagnostic Assay to Differentiate between Bacterial and Non-Bacterial Infections and Reduce Antimicrobial Overuse in Resource-Limited Settings: An Expert Consensus
Source: PubMed Central journal article supplement (PMC4999186; doi:10.1371/journal.pone.0161721), 2016-08-25
Supplement: pone.0161721.s004.pdf [file pone.0161721.s004.pdf]

Supplementary 4: Third draft TPP (January 2016) prepared by SD and shared with the working group prior to the face-to-face meeting.

| Characteristic                                                                                | Acceptable ("must")                                                                                                                   | Desired ("want")                                                                                                            | Reference                                     |
|-----------------------------------------------------------------------------------------------|---------------------------------------------------------------------------------------------------------------------------------------|-----------------------------------------------------------------------------------------------------------------------------|-----------------------------------------------|
| <b>SCOPE</b>                                                                                  |                                                                                                                                       |                                                                                                                             |                                               |
| <b>Goal</b>                                                                                   | Rapid, biomarker-based best testing to differentiate between bacterial and non-bacterial infections to guide antimicrobial treatment. |                                                                                                                             | Expert consensus                              |
| <b>Target population</b>                                                                      | Children with non-severe, non-malarial fever presenting at (what?)                                                                    | Total febrile population presenting with fever.                                                                             | Gething <i>et. al.</i> 2010; WHO 2014 (IMCD); |
| <b>Target level of health system</b>                                                          | Tier 1 low level (passive case finding)                                                                                               |                                                                                                                             | Maputo Declaration 2008                       |
| <b>Target user</b>                                                                            | Healthcare worker                                                                                                                     | Trained lay person                                                                                                          | Petti <i>et. al.</i> 2006                     |
| <b>Price of individual test</b>                                                               | 10 USD                                                                                                                                | < 2 USD or equivalent to a course of antibiotic treatment                                                                   | Expert consensus                              |
| <b>Analytical sensitivity/LoD</b>                                                             | Detection of a relevant bacterial/viral infection during the acute phase of the illness.                                              | Detection of a relevant bacterial infection alone or as a co-infection with malaria, during the acute phase of the illness. | Not applicable                                |
| <b>Diagnostic sensitivity to differentiate between bacterial and non-bacterial infections</b> | Equal or better than 95%                                                                                                              | Equal or better than 99%                                                                                                    | Expert consensus                              |
| <b>Diagnostic specificity</b>                                                                 | Equal or better than 80%                                                                                                              | Equal or better than 90%                                                                                                    | Expert consensus                              |
| <b>TEST PROCEDURE</b>                                                                         |                                                                                                                                       |                                                                                                                             |                                               |
| <b>Multiplexing</b>                                                                           | Marker(s)                                                                                                                             | Marker(s) plus pathogen specific testing (e.g. malaria)                                                                     | Expert consensus                              |
| <b>Ease of test performance</b>                                                               | Not more than 2 timed steps during assay performance                                                                                  | One or no timed step during the assay.                                                                                      | Expert consensus                              |
| <b>Sample type</b>                                                                            | Capillary blood<br>Saliva                                                                                                             |                                                                                                                             | Expert consensus                              |
| <b>Volume</b>                                                                                 | 100µL (~ 4 drops) for older children and adults; 50µL (~2 drops) for young children of capillary blood<br>~0.2-1mL for saliva.        | 25µL (~1 drop) of capillary blood<br>~0.2-1mL for saliva.                                                                   | Expert consensus                              |
| <b>Collection</b>                                                                             | Transfer device included in the test                                                                                                  |                                                                                                                             | Community based consensus                     |
| <b>Additional sample preparation</b>                                                          | 1 sample-processing steps                                                                                                             | None required                                                                                                               | Expert consensus                              |
| <b>Kit configuration</b>                                                                      | No additional reagents outside of the kit required                                                                                    |                                                                                                                             | Community based consensus                     |

|                                                |                                                                                                                                  |                                                                                                                   |                                          |
|------------------------------------------------|----------------------------------------------------------------------------------------------------------------------------------|-------------------------------------------------------------------------------------------------------------------|------------------------------------------|
| <b>Control material</b>                        | Positive and negative and internal control provided with each test.                                                              |                                                                                                                   | Community based consensus                |
| <b>Reagent preparation</b>                     | Minimal of one additional step to prepare prior to use<br>No (precise) measuring required.                                       | No additional reagents required, everything is provided ready-to-use                                              | Chua <i>et. al.</i> 2015                 |
| <b>Time to result (per sample)</b>             | Less than 60min                                                                                                                  | Less than 20min                                                                                                   | WHO meeting report-TPP for TB diagnostic |
| <b>Hands on time</b>                           | Total hands-on-time should be less than 5 min                                                                                    | Total hands on time should be less than 3 min                                                                     | Expert consensus                         |
| <b>Sample capacity</b>                         | Capacity for parallel processing of <10 samples (?)                                                                              |                                                                                                                   | Expert consensus                         |
| <b>Result stability</b>                        | 30 min                                                                                                                           | 1 hour                                                                                                            | n.a.                                     |
| <b>Analysis type</b>                           | Qualitative                                                                                                                      | Quantitative                                                                                                      | Expert consensus                         |
| <b>OPERATIONAL CHARACTERISTICS</b>             |                                                                                                                                  |                                                                                                                   |                                          |
| <b>Biosafety</b>                               | No need for a biosafety cabinet; basic safety procedures need to be followed (standard PPE)                                      |                                                                                                                   | Laboratory Biosafety Manual, WHO 2014    |
| <b>Waste disposal</b>                          | Biohazard waste                                                                                                                  | Testing device or compostable plastics for minimal environmental impact                                           | n.a.                                     |
| <b>Storage conditions</b>                      | 12 month at fluctuating temperature (5-40°C)<br>Up to 90% relative humidity<br>No controlled temperature required                | 24 month at fluctuating temperature (5-50°C)<br>Up to 90% relative humidity<br>No controlled temperature required | Chua <i>et. al.</i> 2015                 |
| <b>Operation conditions</b>                    | Between 5°C - 40°C<br>Up to 90% humidity                                                                                         | Between 5°C - 50°C<br>Up to 90% humidity                                                                          | Chua <i>et. al.</i> 2015                 |
| <b>Shipping conditions</b>                     | Shipping without cold chain                                                                                                      |                                                                                                                   | Expert consensus                         |
| <b>Training requirements</b>                   | Less than 2 days including proficiency panel                                                                                     | Less than half a day including proficiency panel                                                                  | Chua <i>et. al.</i> 2015                 |
| <b>Equipment (instrument external to test)</b> | Small, portable or hand-held integrated instrument (<1kg) that must operate on battery                                           | Instrumentation free.                                                                                             | Expert consensus                         |
| <b>Power supply</b>                            | Battery or solar powered                                                                                                         | None required.                                                                                                    | Chua <i>et. al.</i> 2015                 |
| <b>Water supply</b>                            | No external water required.                                                                                                      |                                                                                                                   | Community based consensus                |
| <b>External maintenance</b>                    | Preventative maintenance at 2 year or >1000 samples; simple with only minimal expertise<br>Maintenance alert should be included. | None required                                                                                                     | Community based consensus                |
| <b>Calibration</b>                             | Remote calibration or auto-calibration                                                                                           | No calibration required                                                                                           | Community based consensus                |
| <b>Internal process controls</b>               | Included                                                                                                                         |                                                                                                                   | Chua <i>et. al.</i> 2015                 |
| <b>Data interpretation and output</b>          | No interpretation required by user                                                                                               |                                                                                                                   | Expert consensus                         |

|                     |                                |                                |
|---------------------|--------------------------------|--------------------------------|
| <b>Connectivity</b> | Wireless connectivity required | TPP in development at FIND/WHO |
|---------------------|--------------------------------|--------------------------------|
